# Supplementary material for: Forecasting future Humphrey Visual Fields using deep learning
Source: PubMed Central journal article supplement (PMC6450620; doi:10.1371/journal.pone.0214875), 2019-04-05
Supplement: pone.0214875.s002.pdf [file pone.0214875.s002.pdf]

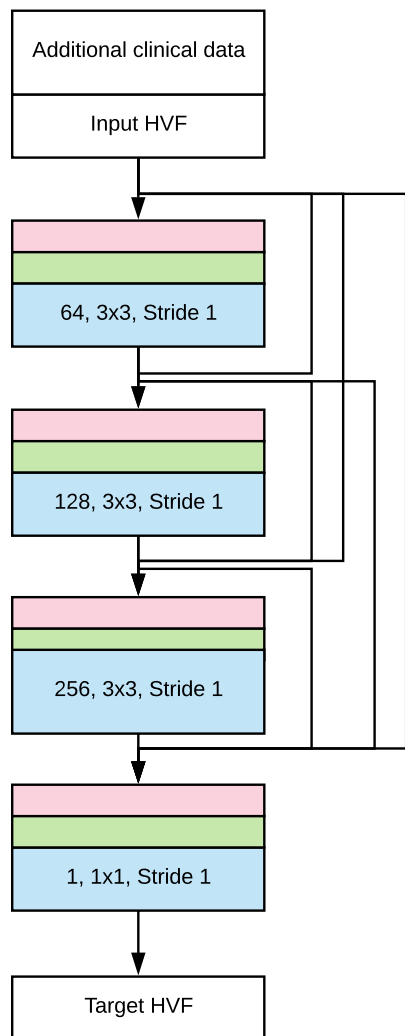

**CascadeNet-1**

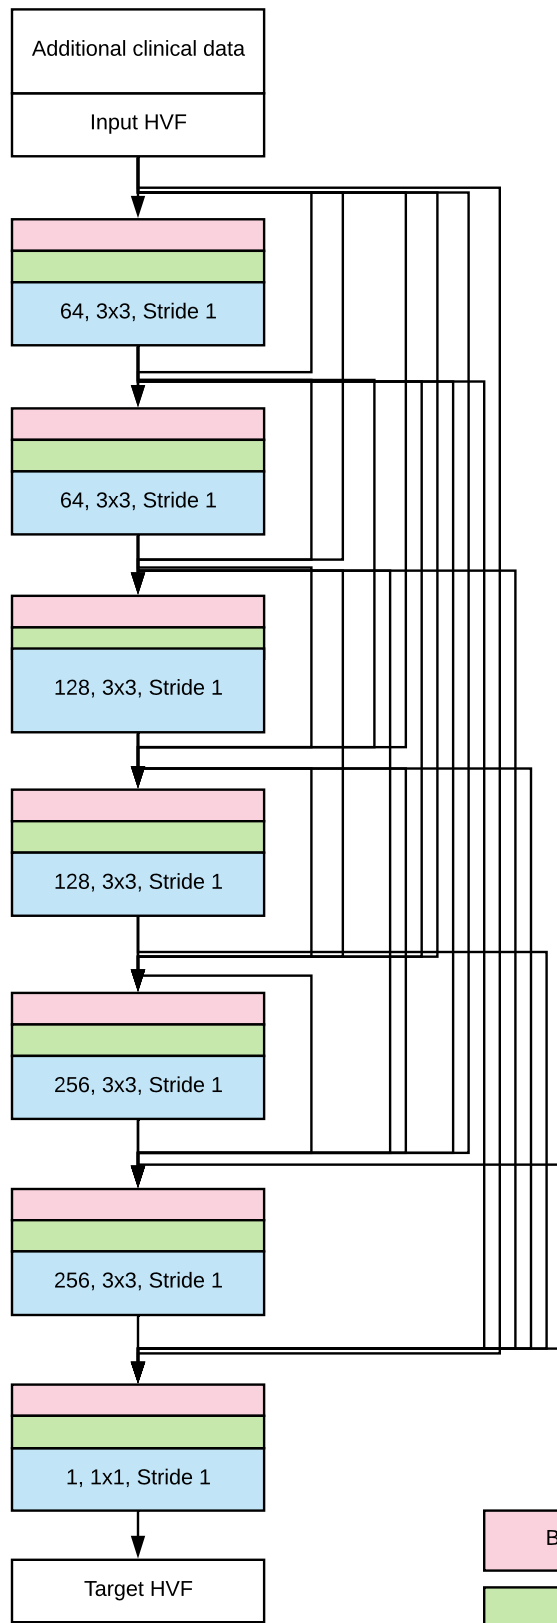

**CascadeNet-2**

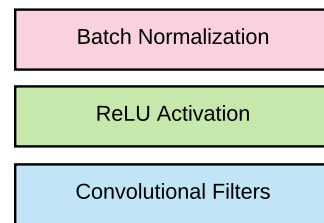

**Supplementary Figure 2: Simplified schematic of the CascadeNet architecture.** CascadeNet-1 has 1 copy of convolutional (CN) layers of 64, 128, and 256 filters. CascadeNet-2 has 2 copies of CN layers of 64, 128, and 256 filters. Each black arrow represents a copy-concatenation of the output tensors “cascaded” forward to every possible neural network block. The final model, CascadeNet-5 has 5 copies of CN layers with 64, 128, and 256 filters.
